# Supplementary material for: The effects of patient education programs on medication use among asthma and COPD patients: a propensity score matching with a difference-in-difference regression approach
Source: PubMed Central journal article supplement (PMC4537780; doi:10.1186/s12913-015-0998-6), 2015-08-17
Supplement: 12913_2015_998_MOESM1_ESM.pdf [file 12913_2015_998_MOESM1_ESM.pdf]

## APPENDIX TABLES

**Appendix Table A.1. Key variables in the Saskatchewan Health Administrative Databases**

| <i>Dataset</i>                                                | <i>Key Variables from Dataset</i>                                                                                                                                                                                                                                  |
|---------------------------------------------------------------|--------------------------------------------------------------------------------------------------------------------------------------------------------------------------------------------------------------------------------------------------------------------|
| Person Health Registry System (PHRS)                          | Patient Health Card Number (encrypted)<br>Person year of birth<br>Gender<br>Registered Indian status<br>Status of health insurance coverage<br>Regional Health Authority where person resides                                                                      |
| Hospital Discharge Abstract Database (DAD)                    | Patient Health Card Number (encrypted)<br>Date of admission<br>Date of discharge<br>Discharge diagnosis (ICD, all fields)<br>Mortality in hospital flag<br>Hospital name<br>Hospital category                                                                      |
| Physician Services Claims File: Medical Services Branch (MSB) | Patient Health Card Number (encrypted)<br>Provider MSB number (encrypted)<br>Fee code approved<br>Diagnostic code (ICD or MSB) associated with service<br>Date of service<br>Number of services<br>Type of service or major group code<br>Location of service code |
| Prescription Drug Plan Historical Claims                      | Patient Health Card Number (encrypted)<br>Drug identification number (DIN)<br>Date of dispensing<br>Quantity of drug dispensed<br>Drug type (EDS, MSD)<br>Drug class (Major, minor)                                                                                |
| Vital Statistics                                              | Patient Health Card Number (encrypted)<br>Date of death                                                                                                                                                                                                            |

**Appendix Table B.1. Propensity Score Estimations based on probit specification**

| Variable name                | Coefficient | p-values | Variable name                    | Coefficient | p-values |
|------------------------------|-------------|----------|----------------------------------|-------------|----------|
| Age                          | -0.01*      | 0.03     | Slush Code Serv. – 2001          | -0.13       | 0.59     |
| Age square                   | 0.01*       | 0.01     | Slush Code Serv. – 2002          | -0.03       | 0.54     |
| Male                         | -0.27*      | 0.02     | Slush Code Serv. – 2003          | 0.10        | 0.30     |
| Age x Male                   | 0.01        | 0.11     | Slush Code Serv. – 2004          | 0.01        | 0.93     |
| Urban                        | -0.19**     | 0.01     | Slush Code Serv. – 2005          | -0.03       | 0.83     |
| No Diag. but Drug            | 0.22*       | 0.04     | Slush Code Serv. – 2006          | 0.01        | 0.94     |
| Pulmonary Func. Test – 2001  | 0.33        | 0.09     | Other Slush Code Serv. – 2001    | 0.02        | 0.54     |
| Pulmonary Func. Test – 2002  | -0.29       | 0.26     | Other Slush Code Serv. – 2002    | -0.02       | 0.45     |
| Pulmonary Func. Test – 2003  | -0.18       | 0.42     | Other Slush Code Serv. – 2003    | 0.01        | 0.48     |
| Pulmonary Func. Test – 2004  | -0.44       | 0.08     | Other Slush Code Serv. – 2004    | 0.02        | 0.40     |
| Pulmonary Func. Test – 2005  | 0.30*       | 0.04     | Other Slush Code Serv. – 2005    | -0.01       | 0.95     |
| Pulmonary Func. Test – 2006  | 0.12        | 0.41     | Other Slush Code Serv. – 2006    | 0.03*       | 0.05     |
| Spirometry – 2001            | 0.05        | 0.50     | Physician Costs – 2001           | 0.01        | 0.08     |
| Spirometry – 2002            | -0.03       | 0.66     | Physician Costs – 2002           | 0.01        | 0.63     |
| Spirometry – 2003            | 0.16*       | 0.01     | Physician Costs – 2003           | 0.01        | 0.87     |
| Spirometry – 2004            | -0.12       | 0.24     | Physician Costs – 2004           | -0.01       | 0.07     |
| Spirometry – 2005            | 0.04        | 0.54     | Physician Costs – 2005           | 0.01**      | 0.01     |
| Spirometry – 2006            | 0.16**      | 0.01     | Physician Costs – 2006           | -0.01       | 0.84     |
| Imaging Serv. – 2001         | -0.07       | 0.47     | Myocardial Infarction            | -0.53       | 0.07     |
| Imaging Serv. – 2002         | -0.11       | 0.17     | Cong. Heart Failure              | 0.14        | 0.30     |
| Imaging Serv. – 2003         | -0.03       | 0.71     | Peripheral Vascular              | -0.35       | 0.14     |
| Imaging Serv. – 2004         | 0.01        | 0.98     | Cerebrovascular                  | -0.05       | 0.74     |
| Imaging Serv. – 2005         | 0.03        | 0.51     | Chronic Pulmonary                | 0.67***     | 0.00     |
| Imaging Serv. – 2006         | 0.02        | 0.67     | Connective Tissue                | -0.31       | 0.10     |
| Out province MD Vst. – 2001  | -0.03       | 0.86     | Peptic Ulcer                     | -0.07       | 0.56     |
| Out province -MD Vst. – 2002 | 0.06        | 0.19     | Mild Liver                       | 0.06        | 0.82     |
| Out province MD Vst. – 2003  | -0.34       | 0.25     | Diabetes w/o Complications       | 0.07        | 0.41     |
| Out province MD Vst. – 2004  | 0.02        | 0.76     | Paraplegia & Hemiplegia          | -0.12       | 0.78     |
| Out province MD Vst. – 2005  | -0.04       | 0.72     | Renal Disease                    | -0.40       | 0.15     |
| Out province MD Vst. – 2006  | -0.05       | 0.66     | Cancer                           | -0.23       | 0.14     |
| Non-Clinical MD Serv. – 2001 | 0.81***     | 0.00     | Metastatic Carcinoma             | -0.09       | 0.71     |
| Non-Clinical MD Serv. – 2002 | -0.03       | 0.92     | Cardiac Arrhythmia               | -0.04       | 0.84     |
| Non-Clinical MD Serv. – 2003 | -0.33       | 0.22     | Hypertension (Uncomplicated)     | 0.01        | 0.91     |
| Non-Clinical MD Serv. – 2004 | 0.35*       | 0.04     | Hypothyroidism                   | 0.05        | 0.54     |
| Non-Clinical MD Serv. – 2005 | -0.25       | 0.36     | Obesity                          | 0.46*       | 0.02     |
| Non-Clinical MD Serv. – 2006 | 0.04        | 0.66     | Weight Loss                      | 0.05        | 0.92     |
| Tel. Contact w. MD – 2001    | 0.36*       | 0.04     | Depression/Psychoses             | 0.03        | 0.63     |
| Tel. Contact w. MD – 2002    | 0.02        | 0.87     | GP/FP Respiratory Serv. – 2001   | 0.02        | 0.56     |
| Tel. Contact w. MD – 2003    | -0.30       | 0.29     | GP/FP . Respiratory Serv. – 2002 | 0.05*       | 0.03     |
| Tel. Contact w. MD – 2004    | -0.08       | 0.58     | GP/FP Respiratory Serv. – 2003   | 0.01        | 0.77     |
| Tel. Contact w. MD. – 2005   | 0.14        | 0.14     | GP/FP Respiratory Serv. – 2004   | 0.01        | 0.74     |
| Tel. Contact w. MD. – 2006   | 0.07        | 0.54     |                                  |             |          |

Table B1. Continued

|                                |         |       |                                |       |      |
|--------------------------------|---------|-------|--------------------------------|-------|------|
| GP/FP Respiratory Serv. – 2005 | 0.01    | (0.99 | Hosp. Day Vst. – 2006          | 0.06  | 0.21 |
| GP/FP Respiratory Serv. – 2006 | 0.02    | 0.38  | Hosp. Inp. Resp. Vst – 2001    | -0.12 | 0.78 |
| Spec. Respiratory Serv. – 2001 | -0.16   | 0.06  | Hosp. Inp. Resp. Vst – 2002    | 0.14  | 0.54 |
| Spec. Respiratory Serv. – 2002 | -0.01   | 0.87  | Hosp. Inp. Resp. Vst – 2003    | -0.67 | 0.12 |
| Spec. Respiratory Serv. – 2003 | -0.04   | 0.51  | Hosp. Inp. Resp. Vst – 2004    | -0.08 | 0.76 |
| Spec. Respiratory Serv. – 2004 | 0.01    | 0.20  | Hosp. Inp. Resp. Vst – 2005    | 0.32  | 0.09 |
| Spec. Respiratory Serv. – 2005 | -0.034  | 0.45  | Hosp. Inp. Resp. Vst – 2006    | -0.12 | 0.51 |
| Spec. Respiratory Serv. – 2006 | -0.06   | 0.11  | Hosp. Inp Other Vst – 2001     | 0.11  | 0.34 |
| GP/FP Other Serv. – 2001       | -0.01   | 0.34  | Hosp. Inp Other Vst – 2002     | -0.25 | 0.04 |
| GP/FP Other Serv. – 2002       | 0.01    | 0.79  | Hosp. Inp Other Vst – 2003     | 0.08  | 0.45 |
| GP/FP Other Serv. – 2003       | -0.01   | 0.53  | Hosp. Inp Other Vst – 2004     | -0.01 | 0.97 |
| GP/FP Other Serv. – 2004       | 0.01    | 0.09  | Hosp. Inp Other Vst – 2005     | -0.05 | 0.71 |
| GP/FP Other Serv. – 2005       | -0.01   | 0.21  | Hosp. Inp Other Vst – 2006     | -0.15 | 0.20 |
| GP/FP Other Serv. – 2006       | 0.01    | 0.53  | Asthma Drugs (Unc.) – 2001     | -0.03 | 0.81 |
| Spec. Other Serv. – 2001       | -0.02   | 0.15  | Asthma Drugs (Unc.) – 2002     | -0.05 | 0.52 |
| Spec. Other Serv. – 2002       | 0.01    | 0.51  | Asthma Drugs (Unc.) – 2003     | 0.06  | 0.47 |
| Spec. Other Serv. – 2003       | 0.01    | 0.94  | Asthma Drugs (Unc.) – 2004     | -0.03 | 0.76 |
| Spec. Other Serv. – 2004       | 0.02*   | 0.03  | Asthma Drugs (Unc.) – 2005     | -0.01 | 0.92 |
| Spec. Other Serv. – 2005       | -0.04** | 0.00  | Asthma Drugs (Unc.) – 2006     | 0.01  | 0.99 |
| Spec. Other Serv. – 2006       | 0.01    | 0.90  | Saba & Comb. Drugs – 2001      | -0.03 | 0.58 |
| LOS – 2001                     | -0.01   | 0.30  | Saba & Comb. Drugs – 2002      | -0.01 | 0.93 |
| LOS – 2002                     | 0.01    | 0.89  | Saba & Comb. Drugs – 2003      | -0.04 | 0.32 |
| LOS – 2003                     | -0.01   | 0.48  | Saba & Comb. Drugs – 2004      | 0.02  | 0.50 |
| LOS – 2004                     | 0.01    | 0.98  | Saba & Comb. Drugs – 2005      | -0.03 | 0.41 |
| LOS – 2005                     | -0.03   | 0.28  | Saba & Comb. Drugs – 2006      | 0.09  | 0.00 |
| LOS – 2006                     | -0.01   | 0.90  | Antibiotics – 2001             | -0.05 | 0.31 |
| Hosp. Day Vst. – 2001          | -0.04   | 0.59  | Antibiotics – 2002             | -0.03 | 0.48 |
| Hosp. Day Vst. – 2002          | -0.04   | 0.50  | Antibiotics – 2003             | 0.01  | 0.81 |
| Hosp. Day Vst. – 2003          | 0.02    | 0.73  | Antibiotics – 2004             | -0.04 | 0.40 |
| Hosp. Day Vst. – 2004          | -0.03   | 0.64  | Antibiotics – 2005             | 0.01  | 0.77 |
| Hosp. Day Vst. – 2005          | 0.08    | 0.15  | Antibiotics – 2006             | 0.01  | 0.78 |
| Corticosteroids – 2001         | 0.04    | 0.82  | Antibiotic Costs – 2001        | 0.01  | 0.01 |
| Corticosteroids – 2002         | 0.04    | 0.83  | Antibiotic Costs – 2002        | -0.01 | 0.20 |
| Corticosteroids – 2003         | -0.03   | 0.86  | Antibiotic Costs – 2003        | -0.01 | 0.84 |
| Corticosteroids – 2004         | 0.02    | 0.82  | Antibiotic Costs – 2004        | 0.01  | 0.51 |
| Corticosteroids – 2005         | 0.06    | 0.58  | Antibiotic Costs – 2005        | -0.01 | 0.94 |
| Corticosteroids – 2006         | -0.07   | 0.41  | Antibiotic Costs – 2006        | 0.01  | 0.99 |
| Chronic Man. Drugs – 2001      | -0.01   | 0.84  | Corticosteroid Costs – 2001    | -0.01 | 0.65 |
| Chronic Man. Drugs – 2002      | 0.01    | 0.81  | Corticosteroid Costs – 2002    | -0.01 | 0.60 |
| Chronic Man. Drugs – 2003      | 0.04    | 0.42  | Corticosteroid Costs – 2003    | -0.01 | 0.97 |
| Chronic Man. Drugs – 2004      | -0.06   | 0.14  | Corticosteroid Costs – 2004    | 0.01  | 0.80 |
| Chronic Man. Drugs – 2005      | 0.01    | 0.80  | Corticosteroid Costs – 2005    | -0.01 | 0.68 |
| Chronic Man. Drugs – 2006      | -0.06   | 0.14  | Corticosteroid Costs – 2006    | 0.01  | 0.20 |
| Other Drugs – 2001             | -0.01   | 0.08  | Chronic Man. Drug Costs – 2001 | 0.01  | 0.42 |
| Other Drugs – 2002             | 0.01    | 0.39  | Chronic Man. Drug Costs – 2002 | 0.01  | 0.84 |
| Other Drugs – 2003             | 0.01    | 0.36  | Chronic Man. Drug Costs – 2003 | -0.01 | 0.17 |
| Other Drugs – 2004             | -0.01   | 0.16  | Chronic Man. Drug Costs – 2004 | 0.01  | 0.16 |

**Table B1. Continued**

|                                 |       |      |                                |          |      |
|---------------------------------|-------|------|--------------------------------|----------|------|
| Other Drugs – 2005              | 0.01  | 0.19 | Chronic Man. Drug Costs – 2005 | 0.01     | 0.56 |
| Other Drugs – 2006              | 0.01  | 0.93 | Chronic Man. Drug Costs – 2006 | -0.01    | 0.05 |
| Asthma Drug (Unc.) Costs – 2001 | -0.01 | 0.32 | Other Drug Costs – 2001        | -0.01    | 0.40 |
| Asthma Drug (Unc.) Costs – 2002 | 0.01  | 0.11 | Other Drug Costs – 2002        | -0.01    | 0.99 |
| Asthma Drug (Unc.) Costs – 2003 | 0.01  | 0.55 | Other Drug Costs – 2003        | -0.01    | 0.83 |
| Asthma Drug (Unc.) Costs – 2004 | -0.01 | 0.35 | Other Drug Costs – 2004        | 0.01     | 0.11 |
| Asthma Drug (Unc.) Costs – 2005 | 0.01  | 0.71 | Other Drug Costs – 2005        | -0.01    | 0.20 |
| Asthma Drug (Unc.) Costs – 2006 | -0.01 | 0.77 | Other Drug Costs – 2006        | 0.01     | 0.80 |
| Saba & Comb. Drug Costs – 2001  | 0.01  | 0.83 | Constant                       | -3.22*** | 0.00 |
| Saba & Comb. Drug Costs – 2002  | -0.01 | 0.69 |                                |          |      |
| Saba & Comb. Drug Costs – 2003  | 0.01  | 0.73 |                                |          |      |
| Saba & Comb. Drug Costs – 2004  | -0.01 | 0.45 |                                |          |      |
| Saba & Comb. Drug Costs – 2005  | 0.01  | 0.38 |                                |          |      |
| Saba & Comb. Drug Costs – 2006  | -0.01 | 0.21 |                                |          |      |

Note: Number of observation is 167,513 individuals. \* p-value≤0.05, \*\* p-value≤0.01, \*\*\* p-value≤0.001

**Appendix Table C.1. Baseline Cost and Dispensations of Prescription Drugs**

| <b>Variable</b>                                                                                       | <b>Treatment<br/>(N=185)<br/>Mean (SD)</b> | <b>Control<br/>(N =1,726)<br/>Mean (SD)</b> | <b>Mean Difference Test<br/>(p-value)</b> |
|-------------------------------------------------------------------------------------------------------|--------------------------------------------|---------------------------------------------|-------------------------------------------|
| <b>Chronic Man. Drugs - Total number of dispensed Asthma/COPD related chronic management drugs</b>    |                                            |                                             |                                           |
| 2001                                                                                                  | 1.16 (2.81)                                | 0.83 (2.31)                                 | 0.07                                      |
| 2002                                                                                                  | 1.53 (3.88)                                | 1.06 (2.94)                                 | 0.04                                      |
| 2003                                                                                                  | 1.38 (3.41)                                | 1.00 (2.93)                                 | 0.10                                      |
| 2004                                                                                                  | 1.49 (3.41)                                | 1.07 (3.05)                                 | 0.08                                      |
| 2005                                                                                                  | 1.87 (4.43)                                | 1.39 (3.68)                                 | 0.10                                      |
| 2006                                                                                                  | 2.02 (4.59)                                | 1.44 (3.84)                                 | 0.06                                      |
| <b>Acute Drugs - Total number of dispensed drugs for acute exacerbations</b>                          |                                            |                                             |                                           |
| 2001                                                                                                  | 1.34 (2.28)                                | 1.18 (2.52)                                 | 0.42                                      |
| 2002                                                                                                  | 1.65 (2.92)                                | 1.49 (3.09)                                 | 0.50                                      |
| 2003                                                                                                  | 1.74 (2.95)                                | 1.65 (3.30)                                 | 0.74                                      |
| 2004                                                                                                  | 2.05 (3.51)                                | 1.85 (3.64)                                 | 0.47                                      |
| 2005                                                                                                  | 2.50 (4.07)                                | 2.17 (3.89)                                 | 0.28                                      |
| 2006                                                                                                  | 2.91 (3.82)                                | 2.47 (4.24)                                 | 0.18                                      |
| <b>Asthma Drugs (Unc.) - Total number of dispensed asthma related (unclassified) drugs</b>            |                                            |                                             |                                           |
| 2001                                                                                                  | 0.11 (0.74)                                | 0.08 (0.59)                                 | 0.53                                      |
| 2002                                                                                                  | 0.27 (1.70)                                | 0.16 (0.99)                                 | 0.17                                      |
| 2003                                                                                                  | 0.32 (1.72)                                | 0.20 (1.05)                                 | 0.13                                      |
| 2004                                                                                                  | 0.21 (1.36)                                | 0.13 (0.87)                                 | 0.31                                      |
| 2005                                                                                                  | 0.24 (1.32)                                | 0.17 (1.05)                                 | 0.36                                      |
| 2006                                                                                                  | 0.27 (1.38)                                | 0.20 (1.07)                                 | 0.41                                      |
| <b>Asthma/COPD Drugs - Total number of all Asthma/COPD related dispensed drugs</b>                    |                                            |                                             |                                           |
| 2001                                                                                                  | 2.61 (4.81)                                | 2.09 (4.31)                                 | 0.13                                      |
| 2002                                                                                                  | 3.46 (6.78)                                | 2.70 (5.49)                                 | 0.08                                      |
| 2003                                                                                                  | 3.45 (6.09)                                | 2.85 (5.54)                                 | 0.16                                      |
| 2004                                                                                                  | 3.75 (6.38)                                | 3.06 (5.95)                                 | 0.14                                      |
| 2005                                                                                                  | 4.62 (7.56)                                | 3.74 (6.84)                                 | 0.10                                      |
| 2006                                                                                                  | 5.20 (7.44)                                | 4.12 (7.09)                                 | 0.06                                      |
| <b>Other Drugs - Total number of other (non-Asthma/COPD related) dispensed drugs</b>                  |                                            |                                             |                                           |
| 2001                                                                                                  | 8.15 (11.99)                               | 7.20 (11.60)                                | 0.29                                      |
| 2002                                                                                                  | 13.11 (17.45)                              | 12.25 (19.44)                               | 0.56                                      |
| 2003                                                                                                  | 14.90 (21.60)                              | 13.74 (22.88)                               | 0.51                                      |
| 2004                                                                                                  | 16.10 (21.94)                              | 14.82 (22.64)                               | 0.46                                      |
| 2005                                                                                                  | 17.75 (22.62)                              | 16.82 (24.74)                               | 0.63                                      |
| 2006                                                                                                  | 19.60 (24.67)                              | 17.80 (25.81)                               | 0.36                                      |
| <b>Total Drugs - Total number of all dispensed drugs (Asthma/COPD Drugs + Other Drugs)</b>            |                                            |                                             |                                           |
| 2001                                                                                                  | 10.76 (18.83)                              | 9.29 (12.81)                                | 0.14                                      |
| 2002                                                                                                  | 16.57 (19.84)                              | 14.95 (20.99)                               | 0.31                                      |
| 2003                                                                                                  | 18.35 (23.03)                              | 16.59 (24.27)                               | 0.35                                      |
| 2004                                                                                                  | 19.85 (23.69)                              | 17.88 (24.19)                               | 0.29                                      |
| 2005                                                                                                  | 22.36 (25.24)                              | 20.56 (26.79)                               | 0.38                                      |
| 2006                                                                                                  | 24.80 (27.23)                              | 21.92 (27.84)                               | 0.18                                      |
| <b>Costs</b>                                                                                          |                                            |                                             |                                           |
| <b>Chronic Man. Drug Costs - Total cost of dispensed Asthma/COPD related chronic management drugs</b> |                                            |                                             |                                           |
| 2001                                                                                                  | 69.97 (172.41)                             | 48.72 (145.28)                              | 0.06                                      |
| 2002                                                                                                  | 94.71 (246.01)                             | 63.71 (192.02)                              | 0.04                                      |
| 2003                                                                                                  | 90.66 (237.44)                             | 63.05 (197.62)                              | 0.08                                      |
| 2004                                                                                                  | 109.16 (280.9)                             | 76.30 (239.48)                              | 0.08                                      |
| 2005                                                                                                  | 136.53 (352.09)                            | 103.63 (310.74)                             | 0.18                                      |
| 2006                                                                                                  | 148.90 (354.32)                            | 109.94 (334.46)                             | 0.13                                      |

| Acute Drug Costs - Total cost of dispensed drugs for acute exacerbations                                                         |                    |                    |      |
|----------------------------------------------------------------------------------------------------------------------------------|--------------------|--------------------|------|
| 2001                                                                                                                             | 24.68 (57.29)      | 19.78 (57.34)      | 0.27 |
| 2002                                                                                                                             | 27.73 (70.56)      | 23.43 (60.98)      | 0.37 |
| 2003                                                                                                                             | 32.32 (75.47)      | 27.98 (78.35)      | 0.46 |
| 2004                                                                                                                             | 37.86 (83.19)      | 31.60 (83.26)      | 0.33 |
| 2005                                                                                                                             | 51.72 (121.43)     | 41.31 (99.91)      | 0.19 |
| 2006                                                                                                                             | 62.14 (103.54)     | 50.35 (114.47)     | 0.18 |
| Asthma Drug (Unc.) Costs - Total cost of dispensed asthma related (unclassified) drugs                                           |                    |                    |      |
| 2001                                                                                                                             | 4.75 (32.14)       | 3.48 (32.03)       | 0.61 |
| 2002                                                                                                                             | 15.77 (110.66)     | 7.31 (54.99)       | 0.08 |
| 2003                                                                                                                             | 17.65 (110.23)     | 8.53 (57.61)       | 0.07 |
| 2004                                                                                                                             | 11.64 (82.66)      | 5.60 (41.95)       | 0.10 |
| 2005                                                                                                                             | 12.77 (85.07)      | 7.55 (55.97)       | 0.26 |
| 2006                                                                                                                             | 16.80 (122.48)     | 10.11 (65.15)      | 0.23 |
| Asthma/COPD Drug Costs - Total cost of all Asthma/COPD related dispensed drugs (Chronic. Man. +acute + Asthma (Unc.) Drug Costs) |                    |                    |      |
| 2001                                                                                                                             | 99.39 (215.14)     | 71.97 (185.17)     | 0.06 |
| 2002                                                                                                                             | 138.22 (339.71)    | 94.15 (245.00)     | 0.03 |
| 2003                                                                                                                             | 140.64 (331.45)    | 99.46 (258.72)     | 0.05 |
| 2004                                                                                                                             | 158.66 (350.38)    | 113.50 (296.37)    | 0.06 |
| 2005                                                                                                                             | 201.02 (426.19)    | 152.49 (386.88)    | 0.11 |
| 2006                                                                                                                             | 227.84 (436.28)    | 170.42 (415.88)    | 0.08 |
| Other Drug Costs - Total cost of other (non-Asthma/COPD related) dispensed drugs                                                 |                    |                    |      |
| 2001                                                                                                                             | 266.19 (480.82)    | 238.96 (544.56)    | 0.51 |
| 2002                                                                                                                             | 470.05 (852.21)    | 463.11 (1,142.67)  | 0.93 |
| 2003                                                                                                                             | 621.05 (1,197.91)  | 643.32 (2,061.79)  | 0.89 |
| 2004                                                                                                                             | 705.83 (1,439.59)  | 757.47 (2,696.86)  | 0.80 |
| 2005                                                                                                                             | 719.55 (1,119.83)  | 805.2 (2,766.35)   | 0.68 |
| 2006                                                                                                                             | 841.28 (1,331.30)  | 876.84 (2,789.01)  | 0.86 |
| Total Drug Costs - Total cost of all dispensed drugs (Asthma/COPD + Other drugs)                                                 |                    |                    |      |
| 2001                                                                                                                             | 365.58 (552.63)    | 310.94 (588.40)    | 0.23 |
| 2002                                                                                                                             | 608.26 (971.12)    | 557.25 (1,189.38)  | 0.57 |
| 2003                                                                                                                             | 761.69 (1,288.85)  | 742.78 (2,093.36)  | 0.90 |
| 2004                                                                                                                             | 864.49 (1,505.89)  | 870.97 (2,728.22)  | 0.97 |
| 2005                                                                                                                             | 920.57 (1,264.14)  | 957.71 (2,816.47)  | 0.86 |
| 2006                                                                                                                             | 1069.12 (1,490.32) | 1047.27 (2,840.15) | 0.92 |

**Appendix Table C.2. Baseline Hospital and Physician Service utilizations**

|                                                                                                                                         | <b>Treatment<br/>(N=185)</b> | <b>Control<br/>(N =1,726)</b> |                                           |
|-----------------------------------------------------------------------------------------------------------------------------------------|------------------------------|-------------------------------|-------------------------------------------|
| <b>Variable</b>                                                                                                                         | <b>Mean (SD)</b>             | <b>Mean (SD)</b>              | <b>Mean Difference Test<br/>(p-value)</b> |
| <b>Physician Services</b>                                                                                                               |                              |                               |                                           |
| GP/FP Respiratory Serv. - Total number of respiratory related services provided by a family physician                                   |                              |                               |                                           |
| 2001                                                                                                                                    | 0.64 (1.57)                  | 0.57 (1.54)                   | 0.52                                      |
| 2002                                                                                                                                    | 0.90 (1.77)                  | 0.80 (1.83)                   | 0.46                                      |
| 2003                                                                                                                                    | 0.85 (1.73)                  | 0.79 (1.87)                   | 0.69                                      |
| 2004                                                                                                                                    | 0.88 (1.74)                  | 0.76 (1.83)                   | 0.38                                      |
| 2005                                                                                                                                    | 1.03 (1.91)                  | 0.85 (1.81)                   | 0.19                                      |
| 2006                                                                                                                                    | 1.00 (1.86)                  | 0.86 (1.75)                   | 0.29                                      |
| Spec. Respiratory Serv. - Total number of respiratory related services provided by a specialist                                         |                              |                               |                                           |
| 2001                                                                                                                                    | 0.06 (0.54)                  | 0.06 (0.44)                   | 0.48                                      |
| 2002                                                                                                                                    | 0.13 (1.13)                  | 0.12 (0.76)                   | 0.84                                      |
| 2003                                                                                                                                    | 0.11 (0.78)                  | 0.12 (0.82)                   | 0.91                                      |
| 2004                                                                                                                                    | 0.17 (0.83)                  | 0.14 (0.82)                   | 0.63                                      |
| 2005                                                                                                                                    | 0.24 (1.22)                  | 0.16 (0.89)                   | 0.28                                      |
| 2006                                                                                                                                    | 0.26 (1.02)                  | 0.18 (1.00)                   | 0.32                                      |
| GP/FP Other Serv. - Total number of other (non-respiratory) related services provided by a family physician                             |                              |                               |                                           |
| 2001                                                                                                                                    | 5.50 (5.66)                  | 5.30 (6.39)                   | 0.67                                      |
| 2002                                                                                                                                    | 7.94 (7.88)                  | 7.97 (9.87)                   | 0.97                                      |
| 2003                                                                                                                                    | 8.36 (6.98)                  | 8.18 (10.29)                  | 0.81                                      |
| 2004                                                                                                                                    | 8.93 (8.44)                  | 8.76 (10.90)                  | 0.84                                      |
| 2005                                                                                                                                    | 9.15 (7.38)                  | 8.94 (10.62)                  | 0.80                                      |
| 2006                                                                                                                                    | 9.38 (7.67)                  | 9.22 (10.99)                  | 0.84                                      |
| Spec. Other Serv. - Total number of other (non-respiratory) related services provided by a specialist                                   |                              |                               |                                           |
| 2001                                                                                                                                    | 2.94 (6.04)                  | 2.82 (5.57)                   | 0.80                                      |
| 2002                                                                                                                                    | 4.05 (6.38)                  | 4.33 (8.79)                   | 0.67                                      |
| 2003                                                                                                                                    | 4.31 (6.78)                  | 4.32 (7.70)                   | 0.99                                      |
| 2004                                                                                                                                    | 4.10 (5.63)                  | 3.98 (6.88)                   | 0.82                                      |
| 2005                                                                                                                                    | 3.86 (5.40)                  | 3.66 (6.05)                   | 0.65                                      |
| 2006                                                                                                                                    | 4.81 (6.57)                  | 4.72 (7.91)                   | 0.89                                      |
| <b>Costs</b>                                                                                                                            |                              |                               |                                           |
| Physician Costs - Total cost of all family physician and specialist services                                                            |                              |                               |                                           |
| 2001                                                                                                                                    | 288.00 (482.12)              | 278.70 (446.3)                | 0.79                                      |
| 2002                                                                                                                                    | 394.89 (518.6)               | 408.94 (593.2)                | 0.76                                      |
| 2003                                                                                                                                    | 433.65 (576.6)               | 415.11 (548.1)                | 0.66                                      |
| 2004                                                                                                                                    | 439.78 (421.4)               | 420.97 (482.3)                | 0.59                                      |
| 2005                                                                                                                                    | 508.68 (516.7)               | 479.54 (613.1)                | 0.53                                      |
| 2006                                                                                                                                    | 559.36 (550.2)               | 548.65 (670.1)                | 0.83                                      |
| <b>Hospital Visits</b>                                                                                                                  |                              |                               |                                           |
| Hosp. Day Vst. - Total number of day (outpatient) hospital visits                                                                       |                              |                               |                                           |
| 2001                                                                                                                                    | 0.11 (0.49)                  | 0.10 (0.34)                   | 0.54                                      |
| 2002                                                                                                                                    | 0.16 (0.51)                  | 0.15 (0.49)                   | 0.78                                      |
| 2003                                                                                                                                    | 0.19 (0.44)                  | 0.18 (0.54)                   | 0.78                                      |
| 2004                                                                                                                                    | 0.16 (0.60)                  | 0.16 (0.60)                   | 0.89                                      |
| 2005                                                                                                                                    | 0.20 (0.56)                  | 0.20 (0.67)                   | 0.97                                      |
| 2006                                                                                                                                    | 0.24 (0.61)                  | 0.24 (0.73)                   | 0.95                                      |
| Hosp. Inp. Resp. Vst. – Total number of inpatient hospital visits where a respiratory diagnosis is coded anywhere on patient’s abstract |                              |                               |                                           |
| 2001                                                                                                                                    | 0.01 (0.07)                  | 0.01 (0.07)                   | 0.88                                      |
| 2002                                                                                                                                    | 0.03 (0.19)                  | 0.02 (0.16)                   | 0.80                                      |
| 2003                                                                                                                                    | 0.00 (0.00)                  | 0.01 (0.08)                   | 0.34                                      |
| 2004                                                                                                                                    | 0.02 (0.13)                  | 0.01 (0.14)                   | 0.87                                      |
| 2005                                                                                                                                    | 0.05 (0.28)                  | 0.02 (0.17)                   | 0.06                                      |
| 2006                                                                                                                                    | 0.03 (0.18)                  | 0.01 (0.13)                   | 0.06                                      |

| Hosp. Inp. Other. Vst. – Total number of inpatient hospital visits where a respiratory diagnosis is not coded anywhere on patient's abstract |             |             |      |
|----------------------------------------------------------------------------------------------------------------------------------------------|-------------|-------------|------|
| 2001                                                                                                                                         | 0.09 (0.45) | 0.09 (0.36) | 0.92 |
| 2002                                                                                                                                         | 0.06 (0.25) | 0.06 (0.27) | 0.87 |
| 2003                                                                                                                                         | 0.11 (0.48) | 0.10 (0.39) | 0.61 |
| 2004                                                                                                                                         | 0.08 (0.31) | 0.07 (0.32) | 0.75 |
| 2005                                                                                                                                         | 0.06 (0.26) | 0.06 (0.27) | 0.86 |
| 2006                                                                                                                                         | 0.06 (0.31) | 0.07 (0.32) | 0.79 |
| LOS - Total length of hospital stays (in days)                                                                                               |             |             |      |
| 2001                                                                                                                                         | 0.45 (3.06) | 0.38 (2.26) | 0.69 |
| 2002                                                                                                                                         | 0.54 (3.29) | 0.63 (5.74) | 0.82 |
| 2003                                                                                                                                         | 0.49 (2.10) | 0.48 (2.97) | 0.96 |
| 2004                                                                                                                                         | 0.52 (2.99) | 0.40 (3.08) | 0.63 |
| 2005                                                                                                                                         | 0.45 (1.85) | 0.30 (1.70) | 0.25 |
| 2006                                                                                                                                         | 0.59 (2.44) | 0.39 (2.46) | 0.29 |

Note: S: cells are suppressed due to privacy.



**Appendix Table C.3. Baseline Demographic and Comorbidity Characteristics**

| Variable                                                                                                                                          | Treatment<br>(N=185)<br>Mean (SD) | Control<br>(N =1,726)<br>Mean (SD) | Mean Difference Test<br>(p-value) |
|---------------------------------------------------------------------------------------------------------------------------------------------------|-----------------------------------|------------------------------------|-----------------------------------|
| <i>Demographic Characteristics</i>                                                                                                                |                                   |                                    |                                   |
| Age - Age in 2006                                                                                                                                 | 47.43 (21.9)                      | 46.45 (22.0)                       | 0.57                              |
| Male - 1 if male, 0 if female                                                                                                                     | 0.36 (0.04)                       | 0.36 (0.01)                        | 0.97                              |
| Urban - whether the person lived in an urban area (=1) - majority of the time - during the pre-treatment period                                   |                                   |                                    |                                   |
| 2001 - 2006                                                                                                                                       | 0.75 (0.03)                       | 0.77 (0.01)                        | 0.51                              |
| No Diag. but Drug - whether the person who did not diagnosed with asthma/COPD (pre-treatment) however, used at least one asthma/COPD related drug |                                   |                                    |                                   |
| 2001 - 2006                                                                                                                                       | 0.20 (0.03)                       | 0.20 (0.01)                        | 0.94                              |
| <i>Comorbidities (22 Conditions)</i>                                                                                                              |                                   |                                    |                                   |
| Myocardial Infarction - 1 if diagnosed with “myocardial infarction” during the pre-treatment period, 0 otherwise                                  |                                   |                                    |                                   |
| 2001 -2006                                                                                                                                        | <3% (0.10) <sup>S</sup>           | 0.01 (0.08)                        | 0.41                              |
| Cong. Heart Failure - 1 if diagnosed with “congestive heart failure” during the pre-treatment period, 0 otherwise                                 |                                   |                                    |                                   |
| 2001 - 2006                                                                                                                                       | 0.07 (0.25)                       | 0.06 (0.22)                        | 0.27                              |
| Peripheral Vascular - 1 if diagnosed with “peripheral vascular disease” during the pre-treatment period, 0 otherwise                              |                                   |                                    |                                   |
| 2001 -2006                                                                                                                                        | <3% (0.12) <sup>S</sup>           | 0.01 (0.08)                        | 0.10                              |
| Cerebrovascular - 1 if diagnosed with “cerebrovascular disease” during the pre-treatment period, 0 otherwise                                      |                                   |                                    |                                   |
| 2001 -2006                                                                                                                                        | 0.04 (0.19)                       | 0.03 (0.18)                        | 0.83                              |
| Dementia - 1 if diagnosed with “dementia” during the pre-treatment period, 0 otherwise                                                            |                                   |                                    |                                   |
| 2001 -2006                                                                                                                                        | 0 (0)                             | 0.01 (0.06)                        | 0.39                              |
| Chronic Pulmonary - 1 if diagnosed with “chronic obstructive pulmonary disease” during the pre-treatment period, 0 otherwise                      |                                   |                                    |                                   |
| 2001 -2006                                                                                                                                        | 0.76 (0.43)                       | 0.75 (0.43)                        | 0.94                              |
| Connective Tissue - 1 if diagnosed with “connective tissue/rheumatic disease” during the pre-treatment period, 0 otherwise                        |                                   |                                    |                                   |
| 2001 -2006                                                                                                                                        | <3% (0.14) <sup>S</sup>           | 0.02 (0.14)                        | 0.99                              |
| Peptic Ulcer - 1 if diagnosed with “peptic ulcer disease” during the pre-treatment period, 0 otherwise                                            |                                   |                                    |                                   |
| 2001 -2006                                                                                                                                        | 0.06 (0.23)                       | 0.06 (0.23)                        | 0.90                              |
| Mild Liver - 1 if diagnosed with “mild liver disease” during the pre-treatment period, 0 otherwise                                                |                                   |                                    |                                   |
| 2001 -2006                                                                                                                                        | <3% (0.12) <sup>S</sup>           | 0.01 (0.11)                        | 0.75                              |
| Diabetes w/o Complications - 1 if diagnosed with “diabetes without complications” during the pre-treatment period, 0 otherwise                    |                                   |                                    |                                   |
| 2001 -2006                                                                                                                                        | 0.15 (0.35)                       | 0.14 (0.35)                        | 0.63                              |
| Diabetes w. Complications - 1 if diagnosed with “diabetes with complications” during the pre-treatment period, 0 otherwise                        |                                   |                                    |                                   |
| 2001 -2006                                                                                                                                        | 0 (0)                             | 0.01 (0.09)                        | 0.22                              |
| Paraplegia & Hemiplegia - 1 if diagnosed with “paraplegia and hemiplegia” during the pre-treatment period, 0 otherwise                            |                                   |                                    |                                   |
| 2001 -2006                                                                                                                                        | <3% (0.07) <sup>S</sup>           | <0.4% (0.05) <sup>S</sup>          | 0.56                              |
| Renal Disease - 1 if diagnosed with “renal disease” during the pre-treatment period, 0 otherwise                                                  |                                   |                                    |                                   |
| 2001 -2006                                                                                                                                        | <3% (0.10) <sup>S</sup>           | 0.02 (0.12)                        | 0.61                              |
| Cancer - 1 if diagnosed with “cancer” during the pre-treatment period, 0 otherwise                                                                |                                   |                                    |                                   |
| 2001 -2006                                                                                                                                        | 0.04 (0.19)                       | 0.03 (0.18)                        | 0.66                              |
| Moderate/Severe Liver - 1 if diagnosed with “moderate or severe liver disease” during the pre-treatment period, 0 otherwise                       |                                   |                                    |                                   |
| 2001 -2006                                                                                                                                        | 0 (0)                             | <0.4% (0.02) <sup>S</sup>          | 0.74                              |
| Metastatic Carcinoma. - 1 if diagnosed with “metastatic carcinoma” during the pre-treatment period, 0 otherwise                                   |                                   |                                    |                                   |
| 2001 -2006                                                                                                                                        | <3% (0.12) <sup>S</sup>           | 0.01 (0.12)                        | 0.85                              |
| Cardiac Arrhythmia. - 1 if diagnosed with “cardiac arrhythmia ” during the pre-treatment period, 0 otherwise                                      |                                   |                                    |                                   |
| 2001 -2006                                                                                                                                        | <3% (0.16) <sup>S</sup>           | 0.02 (0.14)                        | 0.86                              |
| Hypertension (Uncomplicated) - 1 if diagnosed with “hypertension (uncomplicated)” during the pre-treatment period, 0 otherwise                    |                                   |                                    |                                   |
| 2001 -2006                                                                                                                                        | 0.39 (0.49)                       | 0.36 (0.48)                        | 0.39                              |
| Hypothyroidism - 1 if diagnosed with “hypothyroidism” during the pre-treatment period, 0 otherwise                                                |                                   |                                    |                                   |
| 2001 -2006                                                                                                                                        | 0.10 (0.31)                       | 0.10 (0.30)                        | 0.96                              |
| Obesity - 1 if diagnosed with “obesity” during the pre-treatment period, 0 otherwise                                                              |                                   |                                    |                                   |
| 2001 -2006                                                                                                                                        | <3% (0.16) <sup>S</sup>           | 0.03 (0.16)                        | 0.94                              |
| Weight Loss - 1 if diagnosed with “weight loss” during the pre -treatment period, 0 otherwise                                                     |                                   |                                    |                                   |
| 2001 -2006                                                                                                                                        | <3% (0.07) <sup>S</sup>           | <0.4% (0.05) <sup>S</sup>          | 0.43                              |
| Depression & Psychoses - 1 if diagnosed with “depression or psychoses” during the pre-treatment period, 0 otherwise                               |                                   |                                    |                                   |
| 2001 -2006                                                                                                                                        | 0.26 (0.44)                       | 0.25 (0.43)                        | 0.92                              |

Note: S: cells are suppressed due to privacy.

**Appendix Table C.4. Other Baseline Characteristics**

| Variable                                                                                                                                     | Treatment<br>(N=185)<br>Mean (SD) | Control<br>(N =1,726)<br>Mean (SD) | Mean Difference Test<br>(p-value) |
|----------------------------------------------------------------------------------------------------------------------------------------------|-----------------------------------|------------------------------------|-----------------------------------|
| <i>Other Patient Characteristics</i>                                                                                                         |                                   |                                    |                                   |
| Pulmonary Func. Test - Total number of full pulmonary function tests taken                                                                   |                                   |                                    |                                   |
| 2001                                                                                                                                         | 0.03 (0.18)                       | 0.02 (0.15)                        | 0.31                              |
| 2002                                                                                                                                         | 0.02 (0.13)                       | 0.01 (0.11)                        | 0.69                              |
| 2003                                                                                                                                         | 0.02 (0.15)                       | 0.02 (0.14)                        | 0.82                              |
| 2004                                                                                                                                         | 0.02 (0.18)                       | 0.01 (0.12)                        | 0.42                              |
| 2005                                                                                                                                         | 0.06 (0.26)                       | 0.05 (0.23)                        | 0.42                              |
| 2006                                                                                                                                         | 0.05 (0.23)                       | 0.03 (0.17)                        | 0.13                              |
| Spirometry - Total number of spirometry taken                                                                                                |                                   |                                    |                                   |
| 2001                                                                                                                                         | 0.08 (0.49)                       | 0.07 (0.43)                        | 0.77                              |
| 2002                                                                                                                                         | 0.08 (0.53)                       | 0.08 (0.48)                        | 0.89                              |
| 2003                                                                                                                                         | 0.11 (0.57)                       | 0.13 (0.64)                        | 0.62                              |
| 2004                                                                                                                                         | 0.09 (0.47)                       | 0.06 (0.37)                        | 0.35                              |
| 2005                                                                                                                                         | 0.12 (0.75)                       | 0.10 (0.51)                        | 0.59                              |
| 2006                                                                                                                                         | 0.20 (0.72)                       | 0.20 (0.74)                        | 0.86                              |
| Imaging Serv. - Total number of diagnostic radiology (x-rays) services to chest (with and without fluoroscopy, and bronchogram (unilateral)) |                                   |                                    |                                   |
| 2001                                                                                                                                         | 0.09 (0.31)                       | 0.09 (0.32)                        | 0.82                              |
| 2002                                                                                                                                         | 0.11 (0.33)                       | 0.11 (0.36)                        | 0.95                              |
| 2003                                                                                                                                         | 0.14 (0.40)                       | 0.14 (0.40)                        | 0.91                              |
| 2004                                                                                                                                         | 0.16 (0.38)                       | 0.15 (0.46)                        | 0.81                              |
| 2005                                                                                                                                         | 0.23 (0.59)                       | 0.22 (0.62)                        | 0.73                              |
| 2006                                                                                                                                         | 0.23 (0.58)                       | 0.25 (0.69)                        | 0.80                              |
| Out Province MD Vst. - Total number of out of province family physician and/or specialist visits                                             |                                   |                                    |                                   |
| 2001                                                                                                                                         | 0.01 (0.07)                       | 0.01 (0.18)                        | 0.91                              |
| 2002                                                                                                                                         | 0.12 (1.41)                       | 0.18 (2.79)                        | 0.78                              |
| 2003                                                                                                                                         | 0.01 (0.07)                       | 0.01 (0.10)                        | 0.86                              |
| 2004                                                                                                                                         | 0.13 (1.36)                       | 0.22 (4.05)                        | 0.75                              |
| 2005                                                                                                                                         | 0.02 (0.29)                       | 0.02 (0.25)                        | 0.99                              |
| 2006                                                                                                                                         | 0.03 (0.27)                       | 0.03 (0.45)                        | 0.92                              |
| Non-Clinical MD Serv. - Total number of non-clinical physician services (i.e. health teaching/counseling regarding treatment)                |                                   |                                    |                                   |
| 2001                                                                                                                                         | 0.02 (0.15)                       | 0.02 (0.16)                        | 0.77                              |
| 2002                                                                                                                                         | 0.01 (0.10)                       | 0.02 (0.19)                        | 0.74                              |
| 2003                                                                                                                                         | 0.01 (0.07)                       | 0.01 (0.07)                        | 0.88                              |
| 2004                                                                                                                                         | 0.03 (0.22)                       | 0.02 (0.20)                        | 0.61                              |
| 2005                                                                                                                                         | 0.01 (0.10)                       | 0.01 (0.16)                        | 0.86                              |
| 2006                                                                                                                                         | 0.05 (0.37)                       | 0.02 (0.20)                        | 0.04*                             |
| Tel. Contact w. MD - Total number of telephone contacts with the physician (i.e. advice/client counseling)                                   |                                   |                                    |                                   |
| 2001                                                                                                                                         | 0.02 (0.16)                       | 0.02 (0.25)                        | 0.80                              |
| 2002                                                                                                                                         | 0.03 (0.21)                       | 0.02 (0.24)                        | 0.61                              |
| 2003                                                                                                                                         | 0.01 (0.07)                       | 0.01 (0.10)                        | 0.78                              |
| 2004                                                                                                                                         | 0.03 (0.22)                       | 0.01 (0.18)                        | 0.35                              |
| 2005                                                                                                                                         | 0.04 (0.45)                       | 0.02 (0.30)                        | 0.39                              |
| 2006                                                                                                                                         | 0.04 (0.45)                       | 0.03 (0.32)                        | 0.63                              |
| Slush Code Serv.- Total number of services received with a slush (multipurpose) codes                                                        |                                   |                                    |                                   |
| 2001                                                                                                                                         | 0.01 (0.07)                       | 0.01 (0.15)                        | 0.76                              |
| 2002                                                                                                                                         | 0.12 (1.55)                       | 0.14 (2.10)                        | 0.90                              |
| 2003                                                                                                                                         | 0.02 (0.22)                       | 0.03 (0.38)                        | 0.70                              |
| 2004                                                                                                                                         | 0.12 (1.40)                       | 0.20 (1.40)                        | 0.77                              |
| 2005                                                                                                                                         | 0.02 (0.22)                       | 0.02 (0.21)                        | 0.97                              |
| 2006                                                                                                                                         | 0.03 (0.23)                       | 0.04 (0.49)                        | 0.90                              |
| Other Slush Code Serv. - Total number of services received with other slush (multipurpose) codes                                             |                                   |                                    |                                   |
| 2001                                                                                                                                         | 0.28 (1.44)                       | 0.19 (1.29)                        | 0.36                              |

|      |             |             |      |
|------|-------------|-------------|------|
| 2002 | 0.39 (1.57) | 0.24 (1.92) | 0.30 |
| 2003 | 0.57 (1.87) | 0.42 (2.08) | 0.35 |
| 2004 | 0.65 (1.77) | 0.53 (2.78) | 0.68 |
| 2005 | 0.59 (1.44) | 0.49 (3.04) | 0.68 |
| 2006 | 0.81 (2.21) | 0.62 (3.05) | 0.42 |

**Appendix Table D.1 Regression results for cost outcomes, 2006 vs. 2008**

|                            | Chronic<br>Man.<br>Drugs | Acute<br>Drugs     | Asthma<br>Drugs<br>(Unc.) | Asthma &<br>COPD<br>Drugs | Other<br>Drugs     | Total Drugs         |
|----------------------------|--------------------------|--------------------|---------------------------|---------------------------|--------------------|---------------------|
| Intervention effect        | 164.53***<br>(0.00)      | -6.45<br>(0.41)    | 34.56<br>(0.06)           | 192.64***<br>(0.00)       | -2.61<br>(0.97)    | 190.03*<br>(0.04)   |
| Tel. Contact w. MD         | 123.98<br>(0.10)         | 4.42<br>(0.38)     | -2.26<br>(0.70)           | 126.14<br>(0.11)          | 133.87<br>(0.06)   | 260.01*<br>(0.05)   |
| Non-Clinical MD Serv.      | -24.71<br>(0.47)         | -5.73<br>(0.26)    | -16.59*<br>(0.04)         | -47.03<br>(0.22)          | 48.57<br>(0.50)    | 1.55<br>(0.99)      |
| Imaging Serv.              | 78.85**<br>(0.01)        | 6.45<br>(0.19)     | 9.77<br>(0.26)            | 95.06***<br>(0.00)        | -14.49<br>(0.63)   | 80.57<br>(0.06)     |
| Other Slush Code Serv.     | -1.18<br>(0.71)          | -1.02<br>(0.08)    | -0.77<br>(0.32)           | -2.96<br>(0.39)           | 2.02<br>(0.79)     | -0.94<br>(0.91)     |
| Myocardial Infarction      | 175.67<br>(0.18)         | 46.38<br>(0.26)    | -41.93<br>(0.10)          | 180.12<br>(0.27)          | 350.69<br>(0.10)   | 530.81<br>(0.09)    |
| Cong. Heart Failure        | 47.10<br>(0.45)          | 2.01<br>(0.94)     | 0.69<br>(0.97)            | 49.79<br>(0.53)           | 152.33<br>(0.24)   | 202.13<br>(0.17)    |
| Peripheral Vascular        | 33.54<br>(0.59)          | -13.73<br>(0.34)   | 6.31<br>(0.75)            | 26.13<br>(0.73)           | 71.56<br>(0.58)    | 97.69<br>(0.55)     |
| Cerebrovascular.           | 133.40<br>(0.30)         | -19.22<br>(0.32)   | 66.17<br>(0.30)           | 180.36<br>(0.16)          | 449.48**<br>(0.01) | 629.84***<br>(0.00) |
| Chronic Pulmonary          | -50.14<br>(0.26)         | 28.26***<br>(0.00) | -16.20<br>(0.34)          | -38.08<br>(0.45)          | 22.74<br>(0.80)    | -15.34<br>(0.89)    |
| Peptic Ulcer               | -115.46<br>(0.07)        | 6.40<br>(0.61)     | -28.30<br>(0.14)          | -137.36*<br>(0.04)        | -23.62<br>(0.84)   | -160.97<br>(0.22)   |
| Mild Liver                 | 327.60<br>(0.09)         | 46.20<br>(0.06)    | -24.38<br>(0.40)          | 349.43<br>(0.13)          | 732.60<br>(0.19)   | 1082.03<br>(0.06)   |
| Diabetes w/o Complications | 59.26<br>(0.43)          | -12.63<br>(0.39)   | -6.47<br>(0.29)           | 40.15<br>(0.61)           | 242.44<br>(0.08)   | 282.60<br>(0.07)    |
| Diabetes w. Complications  | -54.46<br>(0.31)         | 24.15<br>(0.20)    | -22.54<br>(0.39)          | -52.86<br>(0.50)          | 56.76<br>(0.64)    | 3.91<br>(0.98)      |
| Renal Disease              | 46.34<br>(0.74)          | -26.85<br>(0.31)   | 102.20<br>(0.37)          | 121.69<br>(0.62)          | 405.86<br>(0.08)   | 527.55<br>(0.12)    |
| Cancer                     | 117.06<br>(0.25)         | -29.46<br>(0.50)   | -29.72<br>(0.09)          | 57.89<br>(0.46)           | 22.94<br>(0.87)    | 80.83<br>(0.60)     |
| Moderate/Severe Liver      | -135.79<br>(0.54)        | -95.19<br>(0.07)   | 9.99<br>(0.85)            | -220.98<br>(0.37)         | -494.69<br>(0.52)  | -715.68<br>(0.36)   |
| Metastatic. Carcinoma      | 205.19<br>(0.27)         | 27.96<br>(0.55)    | 5.65<br>(0.84)            | 238.80<br>(0.18)          | 377.87<br>(0.13)   | 616.66*<br>(0.02)   |

|                              |                   |                     |                  |                   |                    |                     |
|------------------------------|-------------------|---------------------|------------------|-------------------|--------------------|---------------------|
| Cardiac Arrhythmia           | 27.22<br>(0.80)   | 58.98*<br>(0.05)    | 17.40<br>(0.58)  | 103.59<br>(0.46)  | 42.30<br>(0.85)    | 145.89<br>(0.51)    |
| Hypertension (Uncomplicated) | 84.43<br>(0.16)   | -8.52<br>(0.58)     | -21.27<br>(0.07) | 54.64<br>(0.35)   | -12.13<br>(0.86)   | 42.51<br>(0.65)     |
| Hypothyroidism               | 67.60<br>(0.50)   | 17.31<br>(0.47)     | -13.26<br>(0.13) | 71.65<br>(0.55)   | 322.46<br>(0.16)   | 394.11<br>(0.07)    |
| Depression/Psychoses         | -15.41<br>(0.76)  | 17.27<br>(0.08)     | -1.77<br>(0.91)  | 0.09<br>(1.00)    | 50.54<br>(0.47)    | 50.63<br>(0.59)     |
| Obesity                      | -138.57<br>(0.27) | 19.78<br>(0.56)     | -65.37<br>(0.24) | -184.16<br>(0.28) | -506.57*<br>(0.04) | -690.72**<br>(0.01) |
| Constant                     | -3.05<br>(0.83)   | -16.10***<br>(0.00) | 4.71<br>(0.28)   | -14.45<br>(0.35)  | -1.78<br>(0.96)    | -16.23<br>(0.69)    |

Note: p-values are presented in parenthesis.\* p-value $\leq$ 0.05, \*\* p-value $\leq$ 0.01, \*\*\* p-value $\leq$ 0.001

**Appendix Table D.2. Regression results for cost outcomes, 2006 vs. 2009**

|                            | Chronic<br>Man.<br>Drugs | Acute<br>Drugs     | Asthma<br>Drugs<br>(Unc.) | Asthma &<br>COPD<br>Drugs | Other<br>Drugs      | Total<br>Drugs      |
|----------------------------|--------------------------|--------------------|---------------------------|---------------------------|---------------------|---------------------|
| Intervention effect        | 178.55***<br>(0.00)      | -10.35<br>(0.18)   | 24.05<br>(0.18)           | 192.24***<br>(0.00)       | 51.39<br>(0.53)     | 243.64*<br>(0.02)   |
| Tel. Contact w. MD         | 21.74<br>(0.32)          | 6.10<br>(0.26)     | -1.90<br>(0.63)           | 25.94<br>(0.27)           | -59.09<br>(0.55)    | -33.15<br>(0.75)    |
| Non-Clinical MD Serv.      | 5.56<br>(0.86)           | -3.16<br>(0.76)    | -11.20<br>(0.09)          | -8.79<br>(0.81)           | -38.33<br>(0.62)    | -47.12<br>(0.62)    |
| Imaging Serv.              | 59.70*<br>(0.02)         | 5.31<br>(0.16)     | 6.61<br>(0.40)            | 71.62**<br>(0.01)         | -55.42<br>(0.06)    | 16.21<br>(0.63)     |
| Other Slush Code Serv.     | 0.73<br>(0.79)           | 0.06<br>(0.88)     | -0.18<br>(0.71)           | 0.62<br>(0.84)            | 10.10<br>(0.22)     | 10.71<br>(0.26)     |
| Myocardial Infarction      | 204.03<br>(0.22)         | 44.05<br>(0.37)    | -22.57<br>(0.38)          | 225.51<br>(0.31)          | 567.71*<br>(0.04)   | 793.21<br>(0.06)    |
| Cong. Heart Failure        | 84.10<br>(0.35)          | 1.71<br>(0.96)     | 1.26<br>(0.93)            | 87.07<br>(0.35)           | 266.97<br>(0.10)    | 354.04*<br>(0.05)   |
| Peripheral Vascular        | 123.47<br>(0.36)         | -39.96<br>(0.08)   | -1.00<br>(0.96)           | 82.51<br>(0.58)           | 213.69<br>(0.30)    | 296.20<br>(0.27)    |
| Cerebrovascular            | -11.87<br>(0.90)         | -43.84**<br>(0.01) | 71.96<br>(0.26)           | 16.25<br>(0.86)           | 546.71***<br>(0.00) | 562.96***<br>(0.00) |
| Chronic Pulmonary          | -104.22*<br>(0.05)       | 30.41**<br>(0.01)  | -13.19<br>(0.41)          | -87.00<br>(0.17)          | 36.93<br>(0.71)     | -50.07<br>(0.69)    |
| Peptic Ulcer               | -89.59<br>(0.17)         | -10.75<br>(0.47)   | -18.28<br>(0.18)          | -118.62<br>(0.09)         | 15.96<br>(0.90)     | -102.65<br>(0.45)   |
| Mild Liver                 | 301.23<br>(0.17)         | 32.68<br>(0.15)    | -12.32<br>(0.61)          | 321.59<br>(0.18)          | 896.86<br>(0.12)    | 1218.45*<br>(0.05)  |
| Diabetes w/o Complications | 38.11<br>(0.62)          | -2.93<br>(0.88)    | 2.32<br>(0.76)            | 37.50<br>(0.68)           | 270.24<br>(0.11)    | 307.73<br>(0.12)    |
| Diabetes w. Complications  | -51.68<br>(0.50)         | 21.87<br>(0.29)    | -13.66<br>(0.57)          | -43.47<br>(0.66)          | -174.37<br>(0.19)   | -217.84<br>(0.22)   |
| Renal Disease              | -58.04<br>(0.65)         | 14.84<br>(0.62)    | 60.92<br>(0.44)           | 17.73<br>(0.93)           | 360.17<br>(0.18)    | 377.89<br>(0.24)    |
| Cancer                     | 125.87<br>(0.29)         | -19.10<br>(0.63)   | -17.61<br>(0.19)          | 89.17<br>(0.36)           | 144.76<br>(0.26)    | 233.93<br>(0.12)    |
| Moderate/Severe Liver      | -352.95<br>(0.17)        | -81.96<br>(0.17)   | 13.69<br>(0.75)           | -421.23<br>(0.18)         | 8.67<br>(0.99)      | -412.56<br>(0.71)   |
| Metastatic. Carcinoma      | 421.87<br>(0.07)         | 43.53<br>(0.34)    | -4.75<br>(0.83)           | 460.64<br>(0.06)          | 800.49***<br>(0.00) | 1261.1***<br>(0.00) |
| Cardiac Arrhythmia         | 91.13<br>(0.50)          | 47.75<br>(0.16)    | 14.00<br>(0.67)           | 152.87<br>(0.39)          | 162.74<br>(0.55)    | 315.61<br>(0.32)    |

|                              |                   |                     |                  |                   |                   |                   |
|------------------------------|-------------------|---------------------|------------------|-------------------|-------------------|-------------------|
| Hypertension (Uncomplicated) | 84.71<br>(0.20)   | 4.34<br>(0.75)      | -17.59<br>(0.10) | 71.46<br>(0.29)   | 120.37<br>(0.17)  | 191.83<br>(0.08)  |
| Hypothyroidism               | 10.95<br>(0.92)   | 4.07<br>(0.85)      | -11.59<br>(0.15) | 3.42<br>(0.98)    | 86.17<br>(0.56)   | 89.59<br>(0.64)   |
| Depression/Psychoses         | 8.01<br>(0.89)    | 11.68<br>(0.31)     | 12.99<br>(0.47)  | 32.68<br>(0.67)   | 158.99<br>(0.06)  | 191.68<br>(0.11)  |
| Obesity                      | -117.22<br>(0.36) | 52.29<br>(0.53)     | -50.62<br>(0.25) | -115.55<br>(0.54) | -611.97<br>(0.07) | -727.52<br>(0.10) |
| Constant                     | 3.78<br>(0.82)    | -14.55***<br>(0.00) | 0.42<br>(0.92)   | -10.34<br>(0.55)  | -56.28<br>(0.29)  | -66.62<br>(0.24)  |

Note: p-values are presented in parenthesis. \* p-value $\leq$ 0.05, \*\* p-value $\leq$ 0.01, \*\*\* p-value $\leq$ 0.001

**Appendix Table D.3 Regression results for cost outcomes, 2006 vs. 2010**

|                            | Chronic<br>Man.<br>Drugs | Acute<br>Drugs     | Asthma<br>Drugs<br>(Unc.) | Asthma &<br>COPD<br>Drugs | Other<br>Drugs    | Total<br>Drugs     |
|----------------------------|--------------------------|--------------------|---------------------------|---------------------------|-------------------|--------------------|
| Intervention effect        | 195.53***<br>(0.00)      | -6.09<br>(0.48)    | 15.50<br>(0.35)           | 204.94***<br>(0.00)       | 168.21<br>(0.15)  | 373.15**<br>(0.01) |
| Tel. Contact w. MD         | -144.19*<br>(0.03)       | 0.37<br>(0.96)     | -2.77<br>(0.42)           | -146.58*<br>(0.04)        | -164.70<br>(0.64) | -311.28<br>(0.37)  |
| Non-Clinical MD Serv.      | 0.14<br>(1.00)           | -7.34<br>(0.41)    | -14.0**<br>(0.01)         | -21.25<br>(0.70)          | -45.69<br>(0.77)  | -66.94<br>(0.71)   |
| Imaging Serv.              | 75.83<br>(0.13)          | 12.73***<br>(0.00) | -1.38<br>(0.79)           | 87.18<br>(0.08)           | -41.88<br>(0.60)  | 45.30<br>(0.45)    |
| Other Slush Code Serv.     | 6.03<br>(0.23)           | 0.80<br>(0.48)     | 0.71<br>(0.48)            | 7.54<br>(0.08)            | -21.48<br>(0.14)  | -13.94<br>(0.35)   |
| Myocardial Infarction      | 41.90<br>(0.71)          | 111.18<br>(0.10)   | -13.83<br>(0.43)          | 139.26<br>(0.26)          | 2350.42<br>(0.17) | 2489.68<br>(0.16)  |
| Cong. Heart Failure        | 256.12<br>(0.15)         | -15.84<br>(0.64)   | 5.29<br>(0.66)            | 245.57<br>(0.13)          | 201.45<br>(0.41)  | 447.02<br>(0.12)   |
| Peripheral Vascular        | 83.66<br>(0.23)          | -6.29<br>(0.81)    | -5.30<br>(0.77)           | 72.08<br>(0.41)           | 349.24<br>(0.20)  | 421.32<br>(0.11)   |
| Cerebrovascular            | -23.58<br>(0.87)         | -36.19<br>(0.10)   | 72.15<br>(0.26)           | 12.38<br>(0.91)           | 549.43*<br>(0.05) | 561.81*<br>(0.05)  |
| Chronic Pulmonary          | -177.4***<br>(0.00)      | 25.49<br>(0.08)    | -16.07<br>(0.31)          | -168.0***<br>(0.00)       | 512.63<br>(0.14)  | 344.62<br>(0.35)   |
| Peptic Ulcer               | -94.48<br>(0.26)         | -19.22<br>(0.34)   | 1.58<br>(0.90v)           | -112.12<br>(0.22)         | 69.96<br>(0.74)   | -42.16<br>(0.85)   |
| Mild Liver                 | 353.90*<br>(0.03)        | 55.88<br>(0.08)    | -20.53<br>(0.42)          | 389.24*<br>(0.05)         | 1378.49<br>(0.15) | 1767.74<br>(0.06)  |
| Diabetes w/o Complications | -4.66<br>(0.94)          | 10.03<br>(0.72)    | -3.67<br>(0.60)           | 1.70<br>(0.98)            | 1213.16<br>(0.08) | 1214.86<br>(0.09)  |
| Diabetes w. Complications  | -71.60<br>(0.42)         | 6.53<br>(0.76)     | -8.07<br>(0.69)           | -73.14<br>(0.43)          | -177.96<br>(0.39) | -251.10<br>(0.27)  |
| Renal Disease              | -187.00<br>(0.12)        | -22.07<br>(0.55)   | -17.04<br>(0.38)          | -226.11<br>(0.07)         | 126.11<br>(0.75)  | -100.00<br>(0.79)  |
| Cancer                     | 101.85<br>(0.40)         | -17.11<br>(0.64)   | 0.74<br>(0.95)            | 85.48<br>(0.42)           | -35.13<br>(0.90)  | 50.34<br>(0.86)    |
| Moderate/Severe Liver      | -465.36*<br>(0.04)       | -111.23<br>(0.19)  | 39.28<br>(0.28)           | -537.32*<br>(0.04)        | -652.32<br>(0.58) | -1189.64<br>(0.33) |
| Metastatic. Carcinoma      | 550.06*<br>(0.03)        | 110.92<br>(0.20)   | -17.37<br>(0.41)          | 643.60*<br>(0.04)         | 720.91<br>(0.25)  | 1364.51<br>(0.10)  |
| Cardiac Arrhythmia         | 229.76<br>(0.20)         | 82.95<br>(0.17)    | 11.17<br>(0.72)           | 323.88<br>(0.09)          | -0.07<br>(1.00)   | 323.81<br>(0.48)   |



|                              |                   |                    |                  |                  |                   |                   |
|------------------------------|-------------------|--------------------|------------------|------------------|-------------------|-------------------|
| Hypertension (Uncomplicated) | 72.97<br>(0.25)   | 1.64<br>(0.93)     | -10.07<br>(0.31) | 64.55<br>(0.31)  | 45.22<br>(0.81)   | 109.77<br>(0.57)  |
| Hypothyroidism               | 13.91<br>(0.89)   | -3.13<br>(0.86)    | -6.25<br>(0.46)  | 4.52<br>(0.97)   | -174.88<br>(0.62) | -170.36<br>(0.69) |
| Depression/Psychoses         | -40.46<br>(0.45)  | 1.17<br>(0.91)     | 27.01<br>(0.25)  | -12.28<br>(0.83) | 44.17<br>(0.82)   | 31.89<br>(0.88)   |
| Obesity                      | -144.64<br>(0.28) | 44.20<br>(0.61)    | 57.99<br>(0.17)  | -42.45<br>(0.83) | -123.17<br>(0.77) | -165.62<br>(0.72) |
| Constant                     | 27.38<br>(0.10)   | -11.86**<br>(0.01) | -0.92<br>(0.81)  | 14.60<br>(0.39)  | -122.32<br>(0.11) | -107.72<br>(0.17) |

Note: p-values are presented in parenthesis. \* p-value $\leq$ 0.05, \*\* p-value $\leq$ 0.01, \*\*\* p-value $\leq$ 0.001

**Appendix Table D.4 Regression results for cost outcomes, 2006 vs. 2011**

|                            | Chronic<br>Man.<br>Drugs | Acute<br>Drugs    | Asthma<br>Drugs<br>(Unc.) | Asthma &<br>COPD<br>Drugs | Other<br>Drugs     | Total<br>Drugs     |
|----------------------------|--------------------------|-------------------|---------------------------|---------------------------|--------------------|--------------------|
| Intervention effect        | 157.09***<br>(0.00)      | -8.50<br>(0.40)   | 8.03<br>(0.60)            | 156.62***<br>(0.00)       | 109.13<br>(0.38)   | 265.75<br>(0.06)   |
| Tel. Contact w. MD         | -70.70<br>(0.03)         | -2.05<br>(0.69)   | -1.40<br>(0.60)           | -74.16*<br>(0.03)         | 50.30<br>(0.39)    | -23.86<br>(0.67)   |
| Non-Clinical MD Serv.      | -30.13<br>(0.31)         | -3.19<br>(0.72)   | -8.10<br>(0.08)           | -41.42<br>(0.27)          | -13.57<br>(0.86)   | -55.00<br>(0.51)   |
| Imaging Serv.              | 58.96**<br>(0.01)        | 8.76<br>(0.29)    | 3.22<br>(0.51)            | 70.94**<br>(0.01)         | 43.56<br>(0.81)    | 114.51<br>(0.53)   |
| Other Slush Code Serv.     | 3.55<br>(0.42)           | 1.10<br>(0.29)    | 0.92<br>(0.33)            | 5.57<br>(0.22)            | 22.64<br>(0.32)    | 28.21<br>(0.23)    |
| Myocardial Infarction      | -93.69<br>(0.30)         | 28.61<br>(0.62)   | -17.63<br>(0.18)          | -82.71<br>(0.45)          | 2068.54<br>(0.14)  | 1985.83<br>(0.16)  |
| Cong. Heart Failure        | 248.06<br>(0.11)         | -21.31<br>(0.59)  | 5.43<br>(0.66)            | 232.18<br>(0.12)          | 342.10<br>(0.23)   | 574.28<br>(0.11)   |
| Peripheral Vascular        | -21.67<br>(0.81)         | -5.87<br>(0.83)   | -1.14<br>(0.94)           | -28.68<br>(0.78)          | 325.11<br>(0.23)   | 296.43<br>(0.27)   |
| Cerebrovascular            | -22.33<br>(0.86)         | -30.97<br>(0.26)  | 55.61<br>(0.29)           | 2.31<br>(0.98)            | 478.02<br>(0.09)   | 480.32<br>(0.09)   |
| Chronic Pulmonary          | -142.7***<br>(0.00)      | 36.42**<br>(0.01) | -12.35<br>(0.34)          | -118.59*<br>(0.03)        | 492.51<br>(0.08)   | 373.92<br>(0.21)   |
| Peptic Ulcer               | -69.00<br>(0.38)         | 10.74<br>(0.60)   | -10.27<br>(0.23)          | -68.53<br>(0.38)          | 291.88<br>(0.27)   | 223.35<br>(0.40)   |
| Mild Liver                 | 355.11<br>(0.09)         | 173.18<br>(0.25)  | -19.44<br>(0.31)          | 508.85<br>(0.06)          | 1395.23<br>(0.19)  | 1904.09<br>(0.09)  |
| Diabetes w/o Complications | -31.71<br>(0.66)         | 7.93<br>(0.73)    | -4.21<br>(0.32)           | -27.99<br>(0.69)          | 1081.98<br>(0.07)  | 1053.99<br>(0.08)  |
| Diabetes w. Complications  | 70.85<br>(0.53)          | 27.21<br>(0.32)   | 7.59<br>(0.69)            | 105.65<br>(0.36)          | -276.89<br>(0.23)  | -171.24<br>(0.51)  |
| Renal Disease              | -299.54**<br>(0.01)      | -56.53<br>(0.12)  | -29.22<br>(0.06)          | -385.29**<br>(0.01)       | 132.10<br>(0.80)   | -253.19<br>(0.62)  |
| Cancer                     | 131.85<br>(0.28)         | -5.37<br>(0.87)   | 6.48<br>(0.61)            | 132.96<br>(0.22)          | -295.99<br>(0.25)  | -163.03<br>(0.56)  |
| Moderate/Severe Liver      | -762.7***<br>(0.00)      | -202.13<br>(0.21) | 34.66<br>(0.34)           | -930.2***<br>(0.00)       | -1557.27<br>(0.41) | -2487.48<br>(0.19) |
| Metastatic. Carcinoma      | 589.86*<br>(0.03)        | 58.82<br>(0.41)   | -21.55<br>(0.22)          | 627.13*<br>(0.04)         | 561.59<br>(0.29)   | 1188.72<br>(0.10)  |
| Cardiac Arrhythmia         | 312.80<br>(0.07)         | 154.32<br>(0.10)  | 18.50<br>(0.53)           | 485.62*<br>(0.03)         | 55.96<br>(0.91)    | 541.58<br>(0.28)   |

|                              |         |           |        |         |         |         |
|------------------------------|---------|-----------|--------|---------|---------|---------|
| Hypertension (Uncomplicated) | 146.46* | 31.06     | -4.19  | 173.33* | 171.13  | 344.46* |
|                              | (0.03)  | (0.29)    | (0.64) | (0.02)  | (0.25)  | (0.04)  |
| Hypothyroidism               | 50.29   | -13.50    | -3.47  | 33.32   | 25.52   | 58.84   |
|                              | (0.61)  | (0.40)    | (0.59) | (0.76)  | (0.95)  | (0.90)  |
| Depression/Psychoses         | -23.82  | 10.01     | 8.85   | -4.96   | 70.65   | 65.69   |
|                              | (0.68)  | (0.46)    | (0.51) | (0.94)  | (0.69)  | (0.75)  |
| Obesity                      | -113.69 | 20.10     | -21.81 | -115.40 | -136.95 | -252.35 |
|                              | (0.47)  | (0.78)    | (0.09) | (0.57)  | (0.79)  | (0.64)  |
| Constant                     | 26.22   | -16.90*** | 0.39   | 9.71    | -107.25 | -97.55  |
|                              | (0.11)  | (0.00)    | (0.92) | (0.60)  | (0.14)  | (0.19)  |

Note: p-values are presented in parenthesis.\* p-value $\leq$ 0.05, \*\* p-value $\leq$ 0.01, \*\*\* p-value $\leq$ 0.001

**Appendix Table G.1 Regression results for drug dispensation outcomes, 2006 vs. 2008**

|                               | Chronic<br>management | Acute             | Asthma          | Asthma\COPD       | Other             | Total              |
|-------------------------------|-----------------------|-------------------|-----------------|-------------------|-------------------|--------------------|
| Intervention effect           | 1.52***<br>(0.00)     | 0.03<br>(0.91)    | 0.58*<br>(0.02) | 2.12***<br>(0.00) | -0.73<br>(0.54)   | 1.39<br>(0.34)     |
| Tel. Contact w. MD            | 1.39<br>(0.12)        | 0.17<br>(0.43)    | 0.04<br>(0.74)  | 1.60<br>(0.10)    | 4.90***<br>(0.00) | 6.50***<br>(0.00)  |
| Non-Clinical MD Serv.         | -0.73<br>(0.09)       | 0.15<br>(0.37)    | -0.39<br>(0.07) | -0.96<br>(0.11)   | 1.31<br>(0.48)    | 0.34<br>(0.87)     |
| Imaging Serv.                 | 0.90**<br>(0.01)      | 0.63***<br>(0.00) | 0.15<br>(0.15)  | 1.69***<br>(0.00) | 0.36<br>(0.46)    | 2.04**<br>(0.01)   |
| Other Slush Code Serv.        | -0.03<br>(0.46)       | -0.02<br>(0.54)   | 0.00<br>(0.91)  | -0.05<br>(0.48)   | 0.27*<br>(0.04)   | 0.22<br>(0.18)     |
| Myocardial Infarction         | 0.70<br>(0.73)        | 2.46<br>(0.13)    | -0.66<br>(0.09) | 2.50<br>(0.49)    | (10.17**<br>0.01) | 12.67*<br>(0.04)   |
| Cong. Heart Failure           | 1.01<br>(0.22)        | 0.77<br>(0.21)    | 0.03<br>(0.90)  | 1.81<br>(0.15)    | 8.91***<br>(0.00) | 10.72***<br>(0.00) |
| Peripheral Vascular           | 0.43<br>(0.65)        | 0.13<br>(0.76)    | 0.22<br>(0.48)  | 0.77<br>(0.52)    | -0.03<br>(0.99)   | 0.74<br>(0.78)     |
| Cerebrovascular               | 0.73<br>(0.61)        | -1.42*<br>(0.03)  | 1.17<br>(0.14)  | 0.48<br>(0.77)    | 9.38***<br>(0.00) | 9.86***<br>(0.00)  |
| Chronic Pulmonary             | -0.22<br>(0.68)       | 0.98*<br>(0.02)   | -0.30<br>(0.19) | 0.46<br>(0.58)    | 0.91<br>(0.64)    | 1.38<br>(0.56)     |
| Peptic Ulcer                  | -0.87<br>(0.29)       | 0.33<br>(0.49)    | -0.43<br>(0.12) | -0.97<br>(0.30)   | -2.53<br>(0.41)   | -3.49<br>(0.30)    |
| Mild Liver                    | 3.24<br>(0.11)        | 0.93<br>(0.19)    | 0.07<br>(0.94)  | 4.24<br>(0.15)    | 3.07<br>(0.19)    | 7.31**<br>(0.01)   |
| Diabetes w/o<br>Complications | 0.39<br>(0.66)        | 0.14<br>(0.85)    | -0.11<br>(0.30) | 0.42<br>(0.76)    | 1.87<br>(0.32)    | 2.29<br>(0.38)     |
| Diabetes w.<br>Complications  | -0.61<br>(0.53)       | 0.27<br>(0.68)    | -0.54<br>(0.15) | -0.87<br>(0.56)   | 1.65<br>(0.55)    | 0.77<br>(0.77)     |
| Renal Disease                 | -0.04<br>(0.98)       | -1.47<br>(0.13)   | 1.57<br>(0.36)  | 0.07<br>(0.98)    | 8.02**<br>(0.01)  | 8.09<br>(0.11)     |
| Cancer                        | 1.10<br>(0.20)        | -0.84<br>(0.54)   | -0.46<br>(0.07) | -0.20<br>(0.88)   | -0.90<br>(0.68)   | -1.11<br>(0.68)    |
| Moderate/Severe Liver         | -0.38<br>(0.89)       | -5.14<br>(0.15)   | -0.15<br>(0.89) | -5.67<br>(0.16)   | 13.39<br>(0.54)   | 7.72<br>(0.75)     |
| Metastatic. Carcinoma         | 3.69<br>(0.10)        | 1.25<br>(0.43)    | 0.20<br>(0.64)  | 5.14*<br>(0.05)   | 6.41<br>(0.15)    | 11.55*<br>(0.02)   |

**Table G1. Continued**

|                                 |                 |                    |                  |                   |                 |                 |
|---------------------------------|-----------------|--------------------|------------------|-------------------|-----------------|-----------------|
| Cardiac Arrhythmia              | 0.44<br>(0.78)  | 2.70***<br>(0.00)  | 0.17<br>(0.64)   | 3.31<br>(0.10)    | -1.28<br>(0.62) | 2.03<br>(0.49)  |
| Hypertension<br>(Uncomplicated) | 1.04<br>(0.10)  | -0.20<br>(0.65)    | -0.33*<br>(0.05) | 0.51<br>(0.50)    | 0.78<br>(0.57)  | 1.29<br>(0.42)  |
| Hypothyroidism                  | 0.45<br>(0.67)  | -0.22<br>(0.61)    | -0.20<br>(0.12)  | 0.02<br>(0.99)    | 6.17<br>(0.16)  | 6.19<br>(0.18)  |
| Depression/Psychoses            | -0.10<br>(0.86) | 0.43<br>(0.17)     | 0.12<br>(0.69)   | 0.45<br>(0.60)    | 1.69<br>(0.26)  | 2.14<br>(0.23)  |
| Obesity                         | -1.63<br>(0.30) | 1.40<br>(0.16)     | -1.13<br>(0.22)  | -1.37<br>(0.55)   | -6.60<br>(0.12) | -7.97<br>(0.12) |
| Constant                        | 0.05<br>(0.76)  | -0.61***<br>(0.00) | 0.03<br>(0.63)   | -0.54**<br>(0.01) | 0.58<br>(0.25)  | 0.05<br>(0.93)  |

Note: p-values are presented in parenthesis. \* p-value $\leq$ 0.05, \*\* p-value $\leq$ 0.01, \*\*\* p-value $\leq$ 0.001

**Appendix Table G.2 Regression results for drug dispensation outcomes, 2006 vs. 2009**

|                            | Chronic management | Acute              | Asthma           | Asthma\COPD       | Other              | Total              |
|----------------------------|--------------------|--------------------|------------------|-------------------|--------------------|--------------------|
| Intervention effect        | 1.66***<br>(0.00)  | -0.12<br>(0.69)    | 0.41<br>(0.06)   | 1.95***<br>(0.00) | 0.78<br>(0.55)     | 2.73<br>(0.09)     |
| Tel. Contact w. MD         | 0.25<br>(0.37)     | 0.35<br>(0.11)     | 0.02<br>(0.78)   | 0.61<br>(0.08)    | 0.76<br>(0.61)     | 1.37<br>(0.33)     |
| Non-Clinical MD Serv.      | -0.10<br>(0.83)    | 0.43<br>(0.28)     | -0.36*<br>(0.04) | -0.04<br>(0.96)   | -0.33<br>(0.87)    | -0.37<br>(0.87)    |
| Imaging Serv.              | 0.75**<br>(0.01)   | 0.24<br>(0.11)     | 0.21<br>(0.07)   | 1.20***<br>(0.00) | -0.35<br>(0.56)    | 0.85<br>(0.18)     |
| Other Slush Code Serv.     | 0.01<br>(0.77)     | 0.01<br>(0.58)     | -0.01<br>(0.31)  | 0.01<br>(0.82)    | 0.35**<br>(0.01)   | 0.36*<br>(0.02)    |
| Myocardial Infarction      | 1.48<br>(0.55)     | 1.22<br>(0.39)     | -0.16<br>(0.77)  | 2.54<br>(0.54)    | 14.44***<br>(0.00) | 16.97**<br>(0.01)  |
| Cong. Heart Failure        | 1.13<br>(0.30)     | 0.13<br>(0.84)     | 0.01<br>(1.00)   | 1.26<br>(0.36)    | 9.66***<br>(0.00)  | 10.91***<br>(0.00) |
| Peripheral Vascular        | 1.60<br>(0.35)     | -0.64<br>(0.32)    | 0.05<br>(0.85)   | 1.01<br>(0.62)    | 3.45<br>(0.39)     | 4.46<br>(0.38)     |
| Cerebrovascular            | -0.58<br>(0.60)    | -2.27***<br>(0.00) | 1.35<br>(0.11)   | -1.50<br>(0.31)   | 10.94***<br>(0.00) | 9.44***<br>(0.00)  |
| Chronic Pulmonary          | -0.98<br>(0.10)    | 0.86<br>(0.06)     | -0.08<br>(0.75)  | -0.20<br>(0.84)   | -0.72<br>(0.73)    | -0.92<br>(0.73)    |
| Peptic Ulcer               | -0.81<br>(0.32)    | -0.01<br>(0.99)    | -0.26<br>(0.26)  | -1.08<br>(0.32)   | -1.75<br>(0.61)    | -2.83<br>(0.42)    |
| Mild Liver                 | 3.73<br>(0.12)     | 0.95<br>(0.45)     | 0.36<br>(0.64)   | 5.03<br>(0.13)    | 6.38*<br>(0.05)    | 11.41*<br>(0.03)   |
| Diabetes w/o Complications | 0.14<br>(0.88)     | 0.19<br>(0.79)     | 0.19<br>(0.32)   | 0.52<br>(0.74)    | 2.23<br>(0.28)     | 2.76<br>(0.35)     |
| Diabetes w. Complications  | -0.96<br>(0.40)    | 0.29<br>(0.61)     | -0.36<br>(0.28)  | -1.04<br>(0.50)   | -2.78<br>(0.35)    | -3.82<br>(0.23)    |
| Renal Disease              | -1.07<br>(0.53)    | 0.26<br>(0.79)     | 0.91<br>(0.45)   | 0.10<br>(0.97)    | 6.45*<br>(0.03)    | 6.56<br>(0.08)     |
| Cancer                     | 1.53<br>(0.21)     | -0.58<br>(0.59)    | -0.27<br>(0.18)  | 0.68<br>(0.56)    | 2.40<br>(0.22)     | 3.08<br>(0.15)     |
| Moderate/Severe Liver      | -2.98<br>(0.27)    | -3.94<br>(0.18)    | -0.16<br>(0.87)  | -7.08<br>(0.17)   | 11.19<br>(0.64)    | 4.12<br>(0.88)     |
| Metastatic. Carcinoma      | 6.35*<br>(0.02)    | 2.71<br>(0.11)     | -0.08<br>(0.83)  | 8.98**<br>(0.01)  | 20.28***<br>(0.00) | 29.26***<br>(0.00) |
| Cardiac Arrhythmia         | 1.23<br>(0.53)     | 1.52<br>(0.12)     | 0.07<br>(0.86)   | 2.82<br>(0.28)    | 1.73<br>(0.61)     | 4.54<br>(0.25)     |

**Table G2. Continued**

|                                 |                 |                    |                 |                 |                  |                  |
|---------------------------------|-----------------|--------------------|-----------------|-----------------|------------------|------------------|
| Hypertension<br>(Uncomplicated) | 1.05<br>(0.16)  | 0.44<br>(0.44)     | -0.27<br>(0.07) | 1.22<br>(0.23)  | 4.21**<br>(0.01) | 5.43**<br>(0.01) |
| Hypothyroidism                  | -0.38<br>(0.74) | -0.21<br>(0.82)    | -0.16<br>(0.18) | -0.76<br>(0.69) | 9.46<br>(0.07)   | 8.70<br>(0.10)   |
| Depression/Psychoses            | 0.18<br>(0.79)  | 0.33<br>(0.40)     | 0.29<br>(0.40)  | 0.80<br>(0.46)  | 3.93<br>(0.06)   | 4.73*<br>(0.05)  |
| Obesity                         | -1.52<br>(0.44) | 2.03<br>(0.39)     | -1.06<br>(0.19) | -0.55<br>(0.88) | -11.92<br>(0.14) | -12.46<br>(0.22) |
| Constant                        | 0.14<br>(0.44)  | -0.50***<br>(0.00) | -0.06<br>(0.34) | -0.43<br>(0.08) | 0.26<br>(0.65)   | -0.16<br>(0.80)  |

Note: p-values are presented in parenthesis. \* p-value $\leq$ 0.05, \*\* p-value $\leq$ 0.01, \*\*\* p-value $\leq$ 0.001

**Appendix Table G.3 Regression results for drug dispensation outcomes, 2006 vs. 2010**

|                               | Chronic<br>management | Acute             | Asthma            | Asthma\COPD       | Other              | Total              |
|-------------------------------|-----------------------|-------------------|-------------------|-------------------|--------------------|--------------------|
| Intervention effect           | 1.62***<br>(0.00)     | 0.11<br>(0.74)    | 0.27<br>(0.18)    | 2.01***<br>(0.00) | 0.49<br>(0.71)     | 2.50<br>(0.14)     |
| Tel. Contact w. MD            | -0.91*<br>(0.04)      | -0.13<br>(0.74)   | -0.04<br>(0.36)   | -1.08<br>(0.16)   | 3.23*<br>(0.02)    | 2.15<br>(0.28)     |
| Non-Clinical MD Serv.         | -0.44<br>(0.52)       | 0.05<br>(0.88)    | -0.42**<br>(0.01) | -0.82<br>(0.29)   | -2.68<br>(0.23)    | -3.50<br>(0.19)    |
| Imaging Serv.                 | 0.70<br>(0.14)        | 0.81***<br>(0.00) | 0.00<br>(0.95)    | 1.50**<br>(0.01)  | 1.60<br>(0.07)     | 3.10*<br>(0.02)    |
| Other Slush Code Serv.        | 0.06<br>(0.18)        | 0.03<br>(0.54)    | 0.00<br>(0.72)    | 0.10<br>(0.07)    | 0.08<br>(0.65)     | 0.17<br>(0.33)     |
| Myocardial Infarction         | -0.33<br>(0.79)       | 2.71<br>(0.11)    | -0.04<br>(0.90)   | 2.34<br>(0.31)    | 21.47***<br>(0.00) | 23.81***<br>(0.00) |
| Cong. Heart Failure           | 2.21<br>(0.18)        | -0.08<br>(0.93)   | 0.08<br>(0.60)    | 2.21<br>(0.22)    | 8.80**<br>(0.01)   | 11.01***<br>(0.00) |
| Peripheral Vascular.          | 0.74<br>(0.41)        | -0.33<br>(0.58)   | 0.03<br>(0.91)    | 0.43<br>(0.74)    | 7.29<br>(0.15)     | 7.72<br>(0.13)     |
| Cerebrovascular               | -0.80<br>(0.56)       | -2.35**<br>(0.01) | 1.15<br>(0.14)    | -2.00<br>(0.16)   | 13.46***<br>(0.00) | 11.46***<br>(0.00) |
| Chronic Pulmonary             | -1.49***<br>(0.00)    | 0.41<br>(0.42)    | -0.14<br>(0.56)   | -1.22<br>(0.16)   | 1.58<br>(0.50)     | 0.36<br>(0.90)     |
| Peptic Ulcer                  | -0.78<br>(0.35)       | -0.18<br>(0.83)   | 0.02<br>(0.93)    | -0.95<br>(0.45)   | -0.01<br>(1.00)    | -0.96<br>(0.81)    |
| Mild Liver                    | 4.33**<br>(0.01)      | 1.12<br>(0.49)    | -0.18<br>(0.79)   | 5.28<br>(0.12)    | 6.12*<br>(0.02)    | 11.40***<br>(0.00) |
| Diabetes w/o<br>Complications | -0.49<br>(0.43)       | 0.03<br>(0.97)    | 0.07<br>(0.55)    | -0.39<br>(0.72)   | 5.61*<br>(0.02)    | 5.22<br>(0.08)     |
| Diabetes w. Complications     | -0.86<br>(0.45)       | 0.46<br>(0.57)    | -0.16<br>(0.54)   | -0.57<br>(0.69)   | -2.65<br>(0.40)    | -3.22<br>(0.33)    |
| Renal Disease                 | -2.04<br>(0.17)       | -1.79<br>(0.17)   | -0.48<br>(0.15)   | -4.31*<br>(0.02)  | 3.28<br>(0.33)     | -1.03<br>(0.80)    |
| Cancer                        | 1.25<br>(0.20)        | -0.14<br>(0.90)   | -0.07<br>(0.59)   | 1.04<br>(0.51)    | 4.30<br>(0.11)     | 5.34<br>(0.09)     |
| Moderate/Severe Liver         | -3.82<br>(0.10)       | -4.41<br>(0.20)   | 0.56<br>(0.42)    | -7.68<br>(0.08)   | 7.69<br>(0.69)     | 0.02<br>(1.00)     |
| Metastatic. Carcinoma         | 8.25***<br>(0.00)     | 5.65<br>(0.11)    | -0.24<br>(0.39)   | 13.67*<br>(0.02)  | 22.94***<br>(0.00) | 36.61***<br>(0.00) |
| Cardiac Arrhythmia            | 2.26<br>(0.27)        | 2.39<br>(0.23)    | 0.09<br>(0.81)    | 4.73<br>(0.12)    | -1.25<br>(0.75)    | 3.48<br>(0.48)     |



**Table G3. Continued**

|                                 |                 |                  |                 |                 |                   |                   |
|---------------------------------|-----------------|------------------|-----------------|-----------------|-------------------|-------------------|
| Hypertension<br>(Uncomplicated) | 0.61<br>(0.28)  | 0.71<br>(0.22)   | -0.11<br>(0.42) | 1.22<br>(0.19)  | 5.29***<br>(0.00) | 6.51***<br>(0.00) |
| Hypothyroidism                  | -0.07<br>(0.95) | -0.07<br>(0.93)  | -0.09<br>(0.39) | -0.23<br>(0.89) | 6.94<br>(0.06)    | 6.71<br>(0.13)    |
| Depression/Psychoses            | -0.28<br>(0.57) | 0.16<br>(0.65)   | 0.42<br>(0.25)  | 0.30<br>(0.69)  | 3.82<br>(0.07)    | 4.12<br>(0.07)    |
| Obesity                         | -2.11<br>(0.27) | 1.01<br>(0.58)   | 0.43<br>(0.27)  | -0.67<br>(0.84) | -4.14<br>(0.57)   | -4.82<br>(0.49)   |
| Constant                        | 0.29<br>(0.07)  | -0.37*<br>(0.04) | -0.08<br>(0.13) | -0.16<br>(0.53) | 0.79<br>(0.21)    | 0.63<br>(0.37)    |

Note: p-values are presented in parenthesis. \* p-value $\leq$ 0.05, \*\* p-value $\leq$ 0.01, \*\*\* p-value $\leq$ 0.001

**Appendix Table G.4 Regression results for drug dispensation outcomes, 2006 vs. 2011**

|                               | Chronic<br>management | Acute            | Asthma           | Asthma\COPD        | Other              | Total             |
|-------------------------------|-----------------------|------------------|------------------|--------------------|--------------------|-------------------|
| Intervention effect           | 1.45***<br>(0.00)     | -0.17<br>(0.60)  | 0.17<br>(0.37)   | 1.45*<br>(0.03)    | 1.79<br>(0.24)     | 3.23<br>(0.09)    |
| Tel. Contact w. MD            | -0.68*<br>(0.05)      | 0.10<br>(0.49)   | 0.01<br>(0.98)   | -0.57<br>(0.14)    | 1.62<br>(0.13)     | 1.05<br>(0.27)    |
| Non-Clinical MD Serv.         | -0.62<br>(0.24)       | 0.21<br>(0.29)   | -0.19<br>(0.04)  | -0.60<br>(0.33)    | -0.75<br>(0.45)    | -1.35<br>(0.31)   |
| Imaging Serv.                 | 0.58*<br>(0.02)       | 0.42<br>(0.09)   | 0.07<br>(0.28)   | 1.07**<br>(0.01)   | 0.25<br>(0.74)     | 1.32<br>(0.20)    |
| Other Slush Code Serv.        | 0.02<br>(0.73)        | 0.05<br>(0.18)   | 0.01<br>(0.40)   | 0.08<br>(0.26)     | 0.10<br>(0.46)     | 0.18<br>(0.30)    |
| Myocardial Infarction         | -1.29<br>(0.43)       | 1.57<br>(0.35)   | -0.25<br>(0.16)  | 0.03<br>(0.99)     | 21.70***<br>(0.00) | 21.74**<br>(0.01) |
| Cong. Heart Failure           | 2.25<br>(0.16)        | -0.75<br>(0.43)  | 0.08<br>(0.64)   | 1.57<br>(0.40)     | 14.83**<br>(0.01)  | 16.40*<br>(0.02)  |
| Peripheral Vascular           | -0.44<br>(0.68)       | -0.01<br>(0.99)  | 0.08<br>(0.71)   | -0.37<br>(0.80)    | 3.67<br>(0.50)     | 3.30<br>(0.57)    |
| Cerebrovascular               | -0.75<br>(0.59)       | -2.18*<br>(0.03) | 0.73<br>(0.24)   | -2.20<br>(0.17)    | 10.35***<br>(0.00) | 8.15*<br>(0.02)   |
| Chronic Pulmonary             | -0.98<br>(0.07)       | 1.18*<br>(0.02)  | -0.20<br>(0.26)  | 0.01<br>(1.00)     | 1.48<br>(0.56)     | 1.48<br>(0.64)    |
| Peptic Ulcer                  | -0.28<br>(0.78)       | 0.97<br>(0.21)   | -0.11<br>(0.44)  | 0.58<br>(0.64)     | 4.92<br>(0.15)     | 5.50<br>(0.11)    |
| Mild Liver                    | 4.58<br>(0.06)        | 0.70<br>(0.72)   | -0.14<br>(0.77)  | 5.14<br>(0.15)     | 1.28<br>(0.66)     | 6.42<br>(0.19)    |
| Diabetes w/o<br>Complications | -0.97<br>(0.21)       | 0.34<br>(0.70)   | -0.03<br>(0.58)  | -0.66<br>(0.56)    | 8.20***<br>(0.00)  | 7.54*<br>(0.02)   |
| Diabetes w. Complications     | 0.63<br>(0.66)        | 1.20<br>(0.14)   | 0.09<br>(0.72)   | 1.92<br>(0.27)     | 0.95<br>(0.77)     | 2.87<br>(0.49)    |
| Renal Disease                 | -3.46*<br>(0.03)      | -2.31<br>(0.07)  | -0.60*<br>(0.05) | -6.38***<br>(0.00) | -1.77<br>(0.63)    | -8.14<br>(0.08)   |
| Cancer                        | 1.26<br>(0.19)        | 0.90<br>(0.24)   | 0.05<br>(0.71)   | 2.21<br>(0.11)     | 1.40<br>(0.64)     | 3.61<br>(0.32)    |
| Moderate/Severe Liver         | -7.44**<br>(0.01)     | -4.11<br>(0.20)  | 0.50<br>(0.44)   | -11.05**<br>(0.01) | 21.79<br>(0.21)    | 10.74<br>(0.58)   |
| Metastatic. Carcinoma         | 8.88***<br>(0.00)     | 2.98<br>(0.26)   | -0.30<br>(0.21)  | 11.56*<br>(0.03)   | 13.77*<br>(0.04)   | 25.33*<br>(0.02)  |
| Cardiac Arrhythmia            | 3.28<br>(0.10)        | 3.43<br>(0.15)   | 0.26<br>(0.50)   | 6.97<br>(0.06)     | -0.16<br>(0.97)    | 6.81<br>(0.21)    |

**Table G4. Continued**

|                                 |                 |                    |                 |                  |                   |                   |
|---------------------------------|-----------------|--------------------|-----------------|------------------|-------------------|-------------------|
| Hypertension<br>(Uncomplicated) | 1.62*<br>(0.02) | 0.87<br>(0.15)     | -0.04<br>(0.71) | 2.44*<br>(0.02)  | 6.83***<br>(0.00) | 9.28***<br>(0.00) |
| Hypothyroidism                  | 0.21<br>(0.84)  | -0.52<br>(0.51)    | -0.02<br>(0.84) | -0.33<br>(0.84)  | 10.22*<br>(0.02)  | 9.88<br>(0.07)    |
| Depression/Psychoses            | -0.12<br>(0.84) | 0.54<br>(0.14)     | 0.27<br>(0.34)  | 0.69<br>(0.45)   | 4.98<br>(0.06)    | 5.66<br>(0.08)    |
| Obesity                         | -1.69<br>(0.44) | -0.02<br>(0.99)    | -0.63<br>(0.06) | -2.34<br>(0.44)  | -3.89<br>(0.54)   | -6.23<br>(0.42)   |
| Constant                        | 0.09<br>(0.60)  | -0.66***<br>(0.00) | -0.05<br>(0.26) | -0.62*<br>(0.02) | 1.22<br>(0.07)    | 0.60<br>(0.45)    |

Note: p-values are presented in parenthesis. \* p-value $\leq$ 0.05, \*\* p-value $\leq$ 0.01, \*\*\* p-value $\leq$ 0.001
